# Supplementary material for: Gelatin–poly(vinyl alcohol) porous biocomposites reinforced with graphene oxide as biomaterials
Source: Royal Society of Chemistry journal article supplement (doi:10.1039/c5tb02132d), 2015-11-27
Supplement: c5tb02132d3.pdf [file c5tb02132d3.pdf]

Electronic Supplementary Information caption:

MicroCT videos of Gel – PVA (A) and Gel – PVA / GO 3 wt.% (B) porous scaffolds 3D renderings.
